# Supplementary material for: Eosinophil Cationic Protein Variation in Patients with Asthma and CRSwNP Treated with Dupilumab
Source: MDPI journal article supplement (doi:10.3390/life13091884), 2023-09-08
Supplement: s1 [file s1]

Table S1: Correlation between Serum Eosinophils count and ECP value at each time point. Eos: Eosinophils blood count; ECP: Eosinophils Cationic Protein; RS: Spearman's rank. Data are presented as numbers.

| Time Point           | EOS (cell/mm <sup>3</sup> ) | ECP(U/mL) | Correlation | RS   |
|----------------------|-----------------------------|-----------|-------------|------|
| <b>T0 (Baseline)</b> | 500                         | 69        | p=0.04      | 0.42 |
| <b>T3 months</b>     | 860                         | 107       | p<0.0001    | 0.96 |
| <b>T10 months</b>    | 300                         | 36.5      | p=0.0004    | 0.95 |
